# Supplementary material
Source: PubMed Central journal article supplement (PMC4734892)

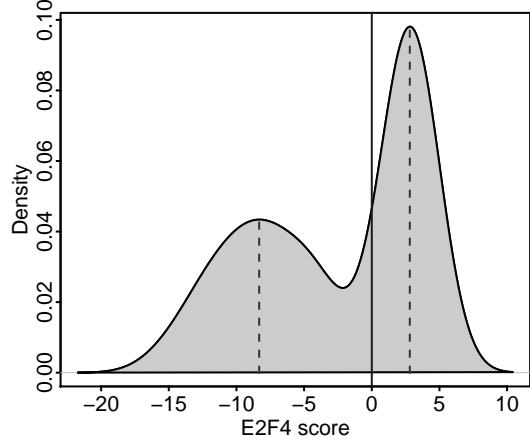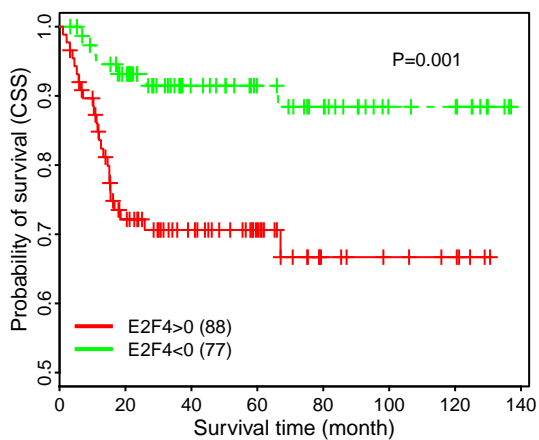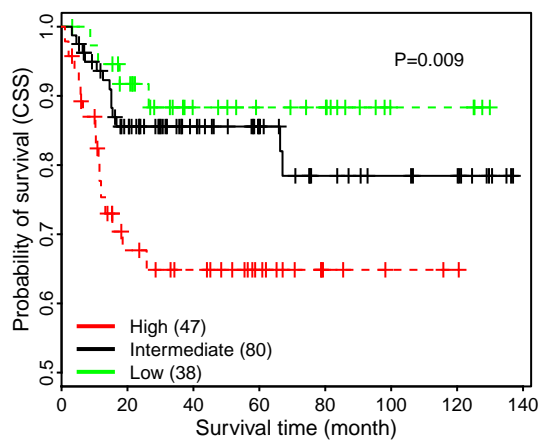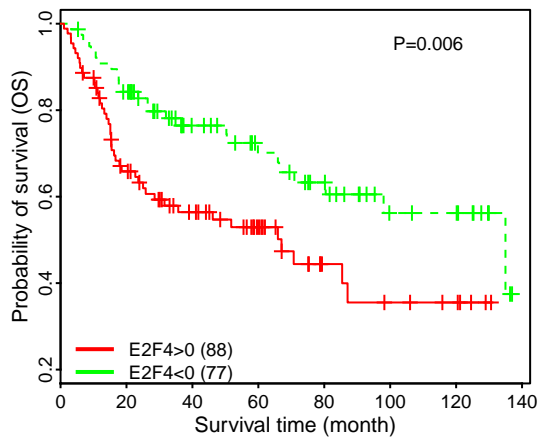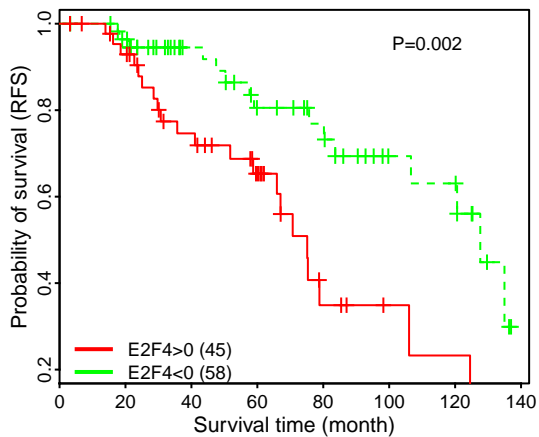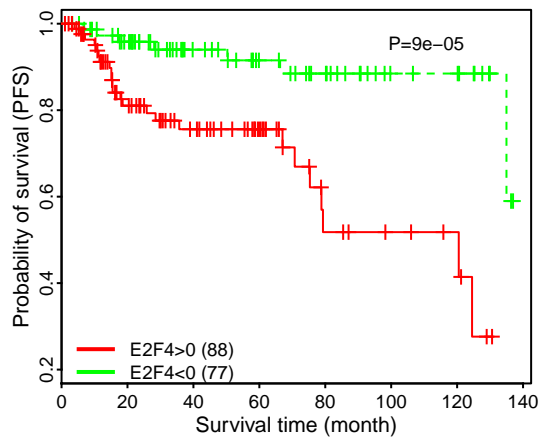

Supplement: NIHMS753519-supplement-FigS1.pdf [file NIHMS753519-supplement-FigS1.pdf]

**NMIBC (superficial)**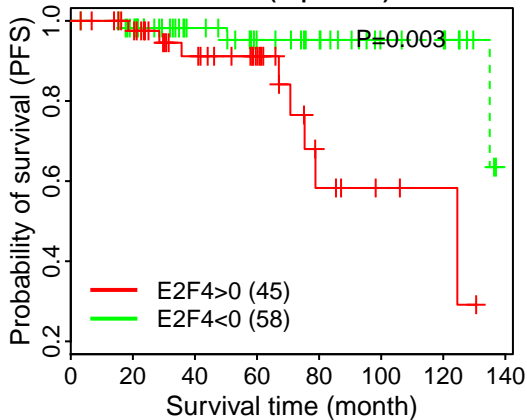**MIBC (invasive)**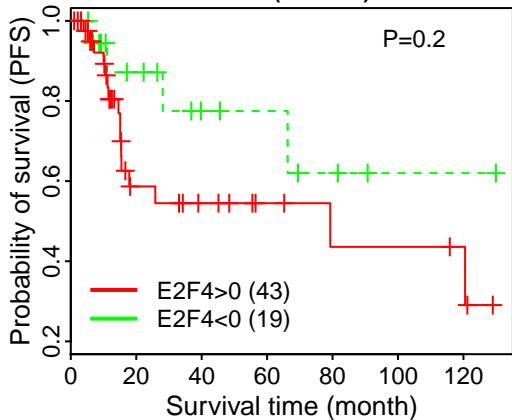**All G1**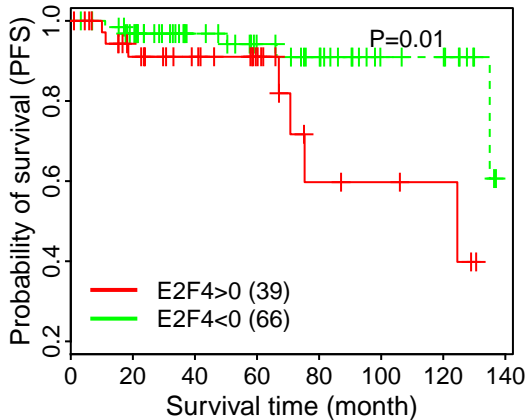**NMIBC G1**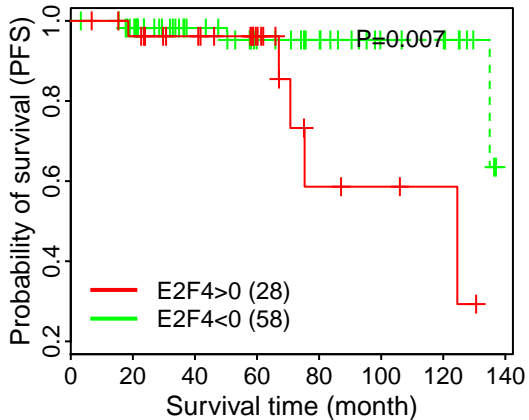

Supplement: NIHMS753519-supplement-FigS2.pdf [file NIHMS753519-supplement-FigS2.pdf]
